# Supplementary material for: Comparison of Surface Functionalization of PLGA Composite to Immobilize Extracellular Vesicles
Source: MDPI journal article supplement (doi:10.3390/polym13213643), 2021-10-22
Supplement: s1 [file s1]

## Supplementary information

# Comparison of surface functionalization of PLGA composite to immobilize extracellular vesicles

Jiwon Woo<sup>‡</sup>, Kyoung-Won Ko<sup>‡</sup>, Seung-Gyu Cha, Yun Heo, and Dong Keun Han\*

Table S1. List of primers sequences used for quantitative real-time PCR analysis

| Gene         | Sequence (5'-3')          |
|--------------|---------------------------|
| h 18s Rrna   | F: gcaattattcccatgaacg    |
|              | R: gggacttaatacaacgcaagc  |
| h E-SELECTIN | F: accagcccaggttgaatg     |
|              | R: gggtggacaaggctgtgc     |
| h ICAM-1     | F: ccttcctcacgtgtactgg    |
|              | R: agcgtagggtaaggttcttgc  |
| h VCAM-1     | F: tgcacagtgacttgtggacata |
|              | R: gccaccactcatctcgattt   |

F: Forward, R: Reverse
